# Supplementary material for: Silver(i) complexes containing antifungal azoles: significant improvement of the anti-Candida potential of the azole drug after its coordination to the silver(i) ion
Source: Royal Society of Chemistry journal article supplement (doi:10.1039/d3dt03010e), 2024-01-01
Supplement: d3dt03010e1.pdf [file d3dt03010e1.pdf]

**Silver(I) complexes containing antifungal azoles: significant  
improvement of the anti-*Candida* potential of the azole drug after its  
coordination to the silver(I) ion**

Mia Stanković,<sup>a</sup> Jakob Kljun,<sup>b</sup> Nevena Lj. Stevanović,<sup>a</sup> Jelena Lazic,<sup>c</sup> Sanja Skaro  
Bogojevic,<sup>c</sup> Sandra Vojnovic,<sup>c</sup> Matija Zlataar,<sup>d</sup> Jasmina Nikodinovic-Runic,<sup>c</sup> Iztok Turel,<sup>\*b</sup>  
Miloš I. Djuran<sup>\*c</sup> and Biljana Đ. Glišić<sup>\*a</sup>

<sup>a</sup>*University of Kragujevac, Faculty of Science, Department of Chemistry, R. Domanovića  
12, 34000 Kragujevac, Serbia*

<sup>b</sup>*University of Ljubljana, Faculty of Chemistry and Chemical Technology, Večna pot 113,  
SI-1000 Ljubljana, Slovenia*

<sup>c</sup>*University of Belgrade, Institute of Molecular Genetics and Genetic Engineering, Vojvode  
Stepe 444a, 11042 Belgrade, Serbia*

<sup>d</sup>*University of Belgrade-Institute of Chemistry, Technology and Metallurgy, Department of  
Chemistry, Njegoševa 12, 11000 Belgrade, Serbia*

<sup>e</sup>*Serbian Academy of Sciences and Arts, Knez Mihailova 35, 11000 Belgrade, Serbia*

\*Corresponding authors.

*E-mail address:* [Iztok.Turel@fkkt.uni-lj.si](mailto:Iztok.Turel@fkkt.uni-lj.si) (I. Turel); [milos.djuran@pmf.kg.ac.rs](mailto:milos.djuran@pmf.kg.ac.rs) (M. I.  
Djuran); [biljana.glisic@pmf.kg.ac.rs](mailto:biljana.glisic@pmf.kg.ac.rs) (B. Đ. Glišić).

**Abstract**

Inspired by the emergence of resistance to currently available antifungal therapy and by the great potential of metal complexes for the treatment of various diseases, we synthesized three new silver(I) complexes containing clinically used antifungal azoles as ligands,  $[\text{Ag}(\text{ecz})_2]\text{SbF}_6$  (**1**, ecz is econazole),  $\{[\text{Ag}(\text{vcz})_2]\text{SbF}_6\}_n$  (**2**, vcz is voriconazole), and  $[\text{Ag}(\text{ctz})_2]\text{SbF}_6$  (**3**, ctz is clotrimazole), and investigated their antimicrobial properties. The synthesized complexes were characterized by mass spectrometry, IR, UV-vis and  $^1\text{H}$  NMR spectroscopy, cyclic voltammetry, and single-crystal X-ray diffraction analysis. In the mononuclear complexes **1** and **3** with ecz and ctz, respectively, the silver(I) ion has the expected linear geometry, in which the azoles are monodentately coordinated to this metal center through the N3 imidazole nitrogen atom. In contrast, the vcz-containing complex **2** has a polymeric structure in the solid state in which the silver(I) ions are coordinated by four nitrogen atoms in a distorted tetrahedral geometry. DFT calculations were done to predict the most favorable structures of the studied complexes in DMSO solution. All the studied silver(I) complexes have shown excellent antifungal and good to moderate antibacterial activities with minimal inhibitory concentration (MIC) values in the ranges of 0.01–27.1 and 2.61–47.9  $\mu\text{M}$  on the selected panel of fungi and bacteria, respectively. Importantly, the complexes **1–3** have exhibited a significantly improved antifungal activity compared to the free azoles, with the most pronounced effect observed in the case of complex **2** compared to the parent vcz against *Candida glabrata* with an increase of activity by five orders of magnitude. Moreover, the silver(I)-azole complexes **2** and **3** significantly inhibited the formation of *C. albicans* hyphae and biofilms at the subinhibitory concentration of 50% MIC. To investigate the impact of the complex **3** more thoroughly on *Candida* pathogenesis, its effect on the adherence of *C. albicans* to A549 cells (human adenocarcinoma alveolar basal epithelial cells), as an initial step of the invasion of host cells, was studied.

**Keywords:** Silver(I) complexes; Antifungal azoles; Structural characterization; Antimicrobial activity; Biofilms

## TABLE OF CONTENTS

|                                                                                                                                                                                                                                                                    |     |
|--------------------------------------------------------------------------------------------------------------------------------------------------------------------------------------------------------------------------------------------------------------------|-----|
| <b>Fig. S1</b> Time-dependent UV-Vis spectra of complexes <b>1 – 3</b> in DMSO at ambient temperature.                                                                                                                                                             | S4  |
| <b>Fig. S2</b> Time-dependent UV-Vis spectra of complexes <b>1 – 3</b> in DMSO/PBS (v/v 7 : 3) at ambient temperature.                                                                                                                                             | S5  |
| <b>Fig. S3</b> <sup>1</sup> H NMR spectra of econazole ( <b>ecz</b> ) and complex <b>1</b> (DMSO, 200 MHz).                                                                                                                                                        | S6  |
| <b>Fig. S4</b> <sup>1</sup> H NMR spectra of voriconazole ( <b>vcz</b> ) and complex <b>2</b> (DMSO, 200 MHz).                                                                                                                                                     | S7  |
| <b>Fig. S5</b> <sup>1</sup> H NMR spectra of clotrimazole ( <b>ctz</b> ) and complex <b>3</b> (DMSO, 200 MHz).                                                                                                                                                     | S8  |
| <b>Fig. S6</b> ESI-HRMS spectra in the positive mode of complex <b>1</b> recorded after its dissolving in CH <sub>3</sub> CN. Main peaks observed can be assigned to the [Ag(ecz) <sub>2</sub> ] <sup>+</sup> (866.9583) and eczH <sup>+</sup> (381.0385) species. | S9  |
| <b>Fig. S7</b> ESI-HRMS spectra in the positive mode of complex <b>2</b> recorded after its dissolving in CH <sub>3</sub> CN. The main peak detected can be assigned to the [Ag(vcz)(MeCN)] <sup>+</sup> species (497.0447).                                       | S10 |
| <b>Fig. S8</b> ESI-HRMS spectra in the positive mode of complex <b>3</b> recorded after its dissolving in CH <sub>3</sub> CN. Main peaks observed can be assigned to the [Ag(ctz) <sub>2</sub> ] <sup>+</sup> (795.1209) and ctzH <sup>+</sup> (277.0811) species. | S11 |
| <b>Fig. S9</b> Cyclic voltammograms of complexes <b>1 – 3</b> recorded at GC electrode in DMSO and 0.1 M TBAHP as a supporting electrolyte with a scan rate of 50 mV s <sup>-1</sup> .                                                                             | S12 |
| <b>Fig. S10</b> UV-Vis spectrophotometric ergosterol profiles between 240 and 300 nm of <i>C. albicans</i> ATCC 10231 cultures treated with 0.5 × MIC of complexes <b>2</b> and <b>3</b> , azoles vcz and ctz, and AgSbF <sub>6</sub> .                            | S13 |
| <b>Fig. S11</b> Photographs of the analyzed crystals of complexes <b>1 – 3</b> .                                                                                                                                                                                   | S14 |
| <b>Fig. S12</b> Photograph of the crystals of <b>3</b> under the microscope (10× magnification).                                                                                                                                                                   | S15 |
| <b>Table S1</b> The selectivity index value (SI) of silver(I) complexes <b>1 – 3</b> and the azoles on <i>Candida</i> strains                                                                                                                                      | S16 |
| <b>Table S2</b> Percentage of <i>C. albicans</i> ATCC 10231 biofilm formation inhibition by treatment with 0.5 × MIC of the tested compounds after 48 h                                                                                                            | S17 |
| <b>Table S3</b> Crystallographic data for complexes <b>1 – 3</b>                                                                                                                                                                                                   | S18 |
| Spectroscopic characterization of the studied azoles                                                                                                                                                                                                               | S19 |

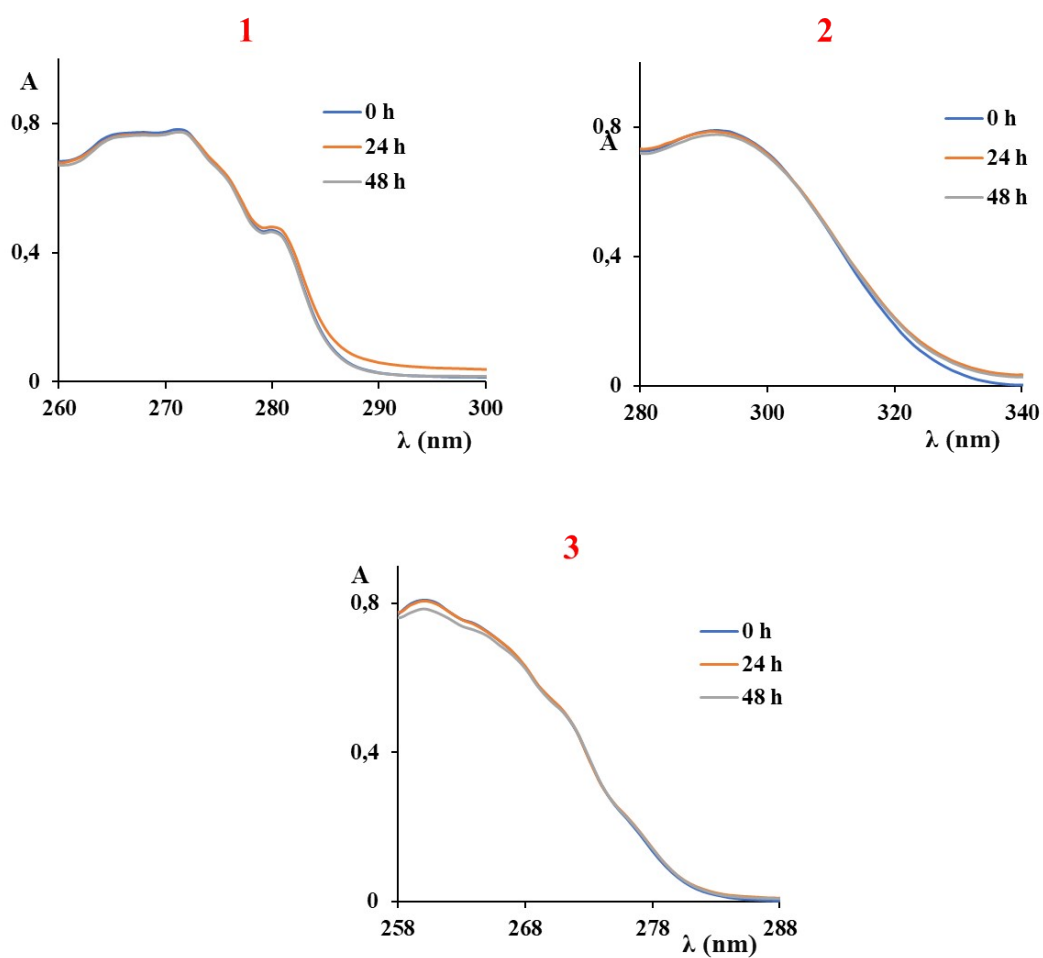

**Fig. S1** Time-dependent UV-Vis spectra of complexes **1** – **3** in DMSO at ambient temperature.

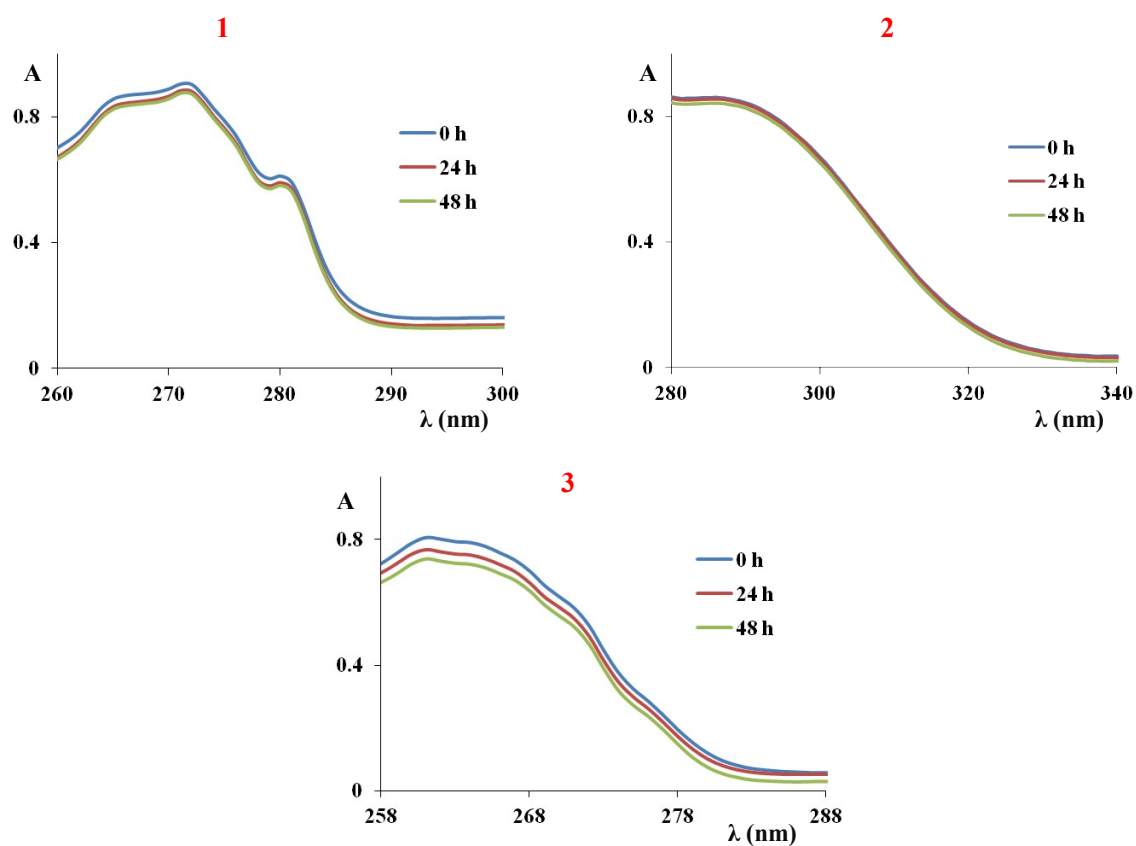

**Fig. S2** Time-dependent UV-Vis spectra of complexes **1** – **3** in DMSO/PBS (v/v 7 : 3) at ambient temperature.

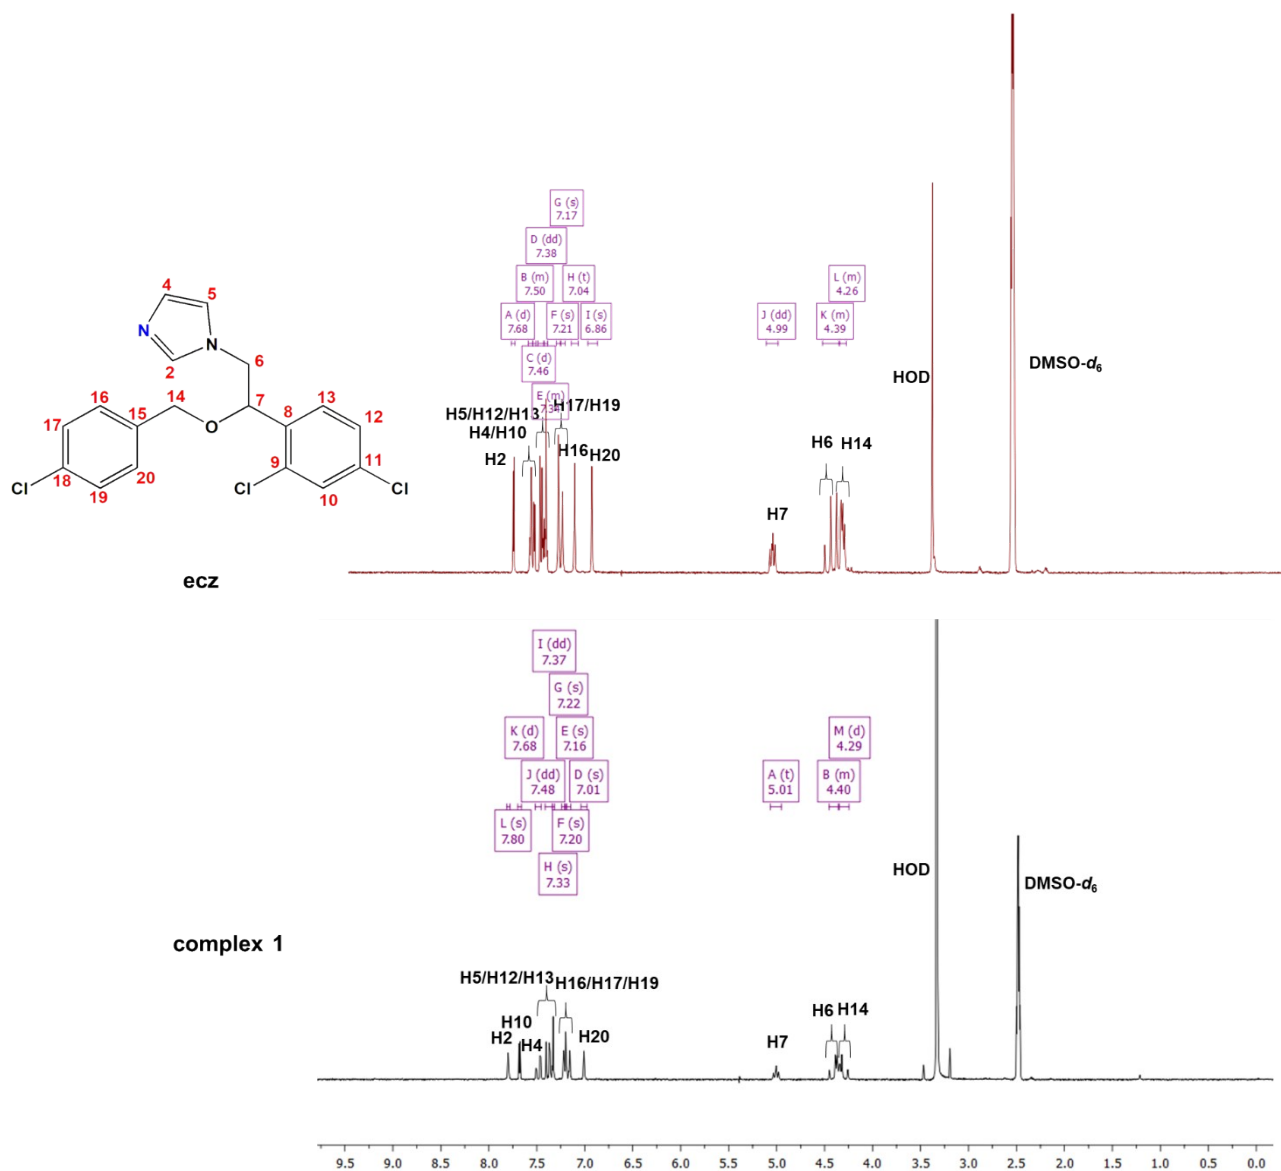

**Fig. S3**  $^1\text{H}$  NMR spectra of econazole (**ecz**) and complex **1** (DMSO, 200 MHz).

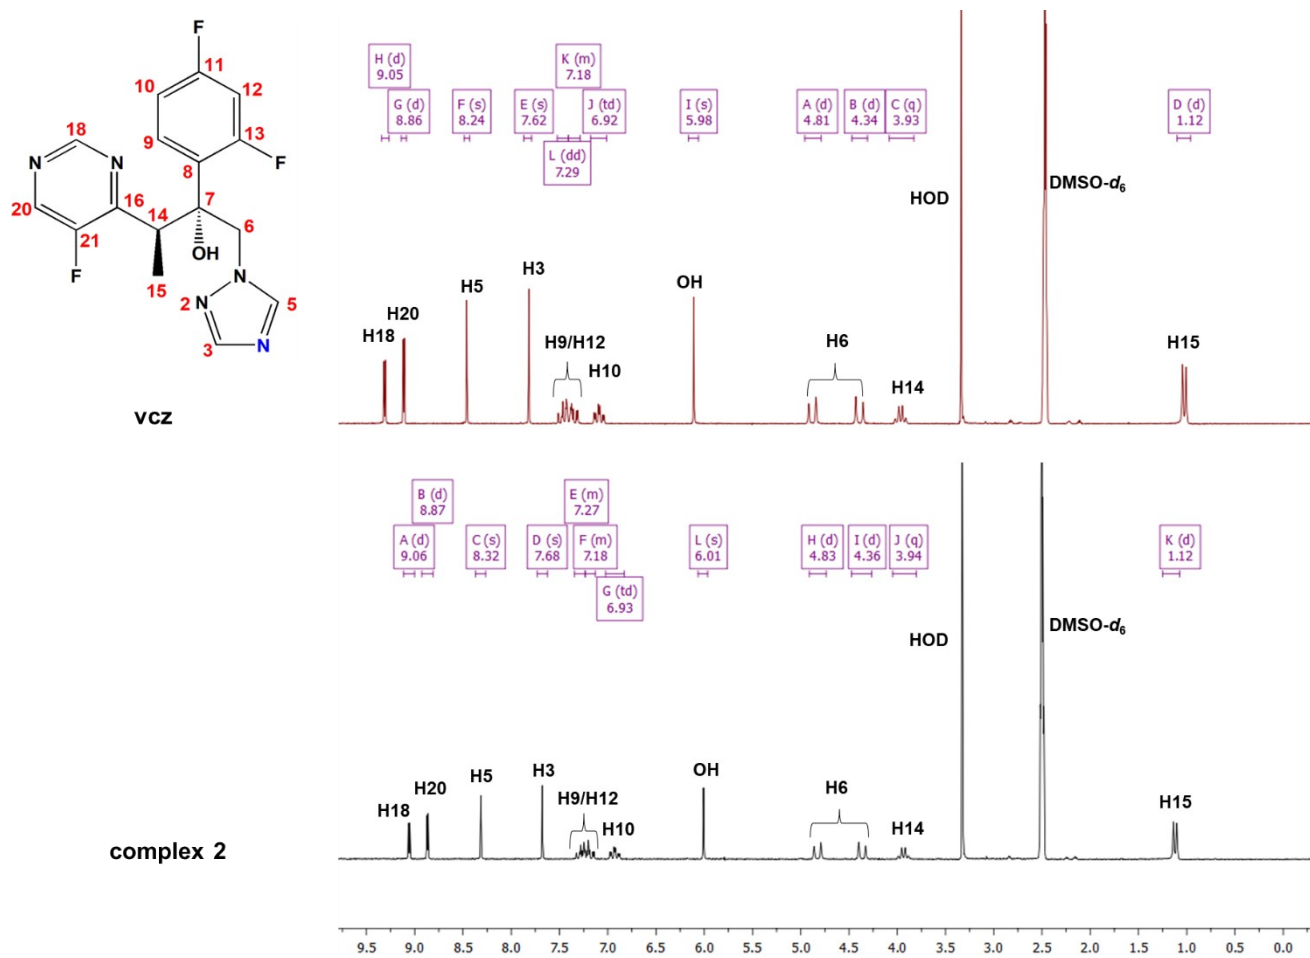

Fig. S4  $^1\text{H}$  NMR spectra of voriconazole (vcz) and complex 2 (DMSO, 200 MHz).

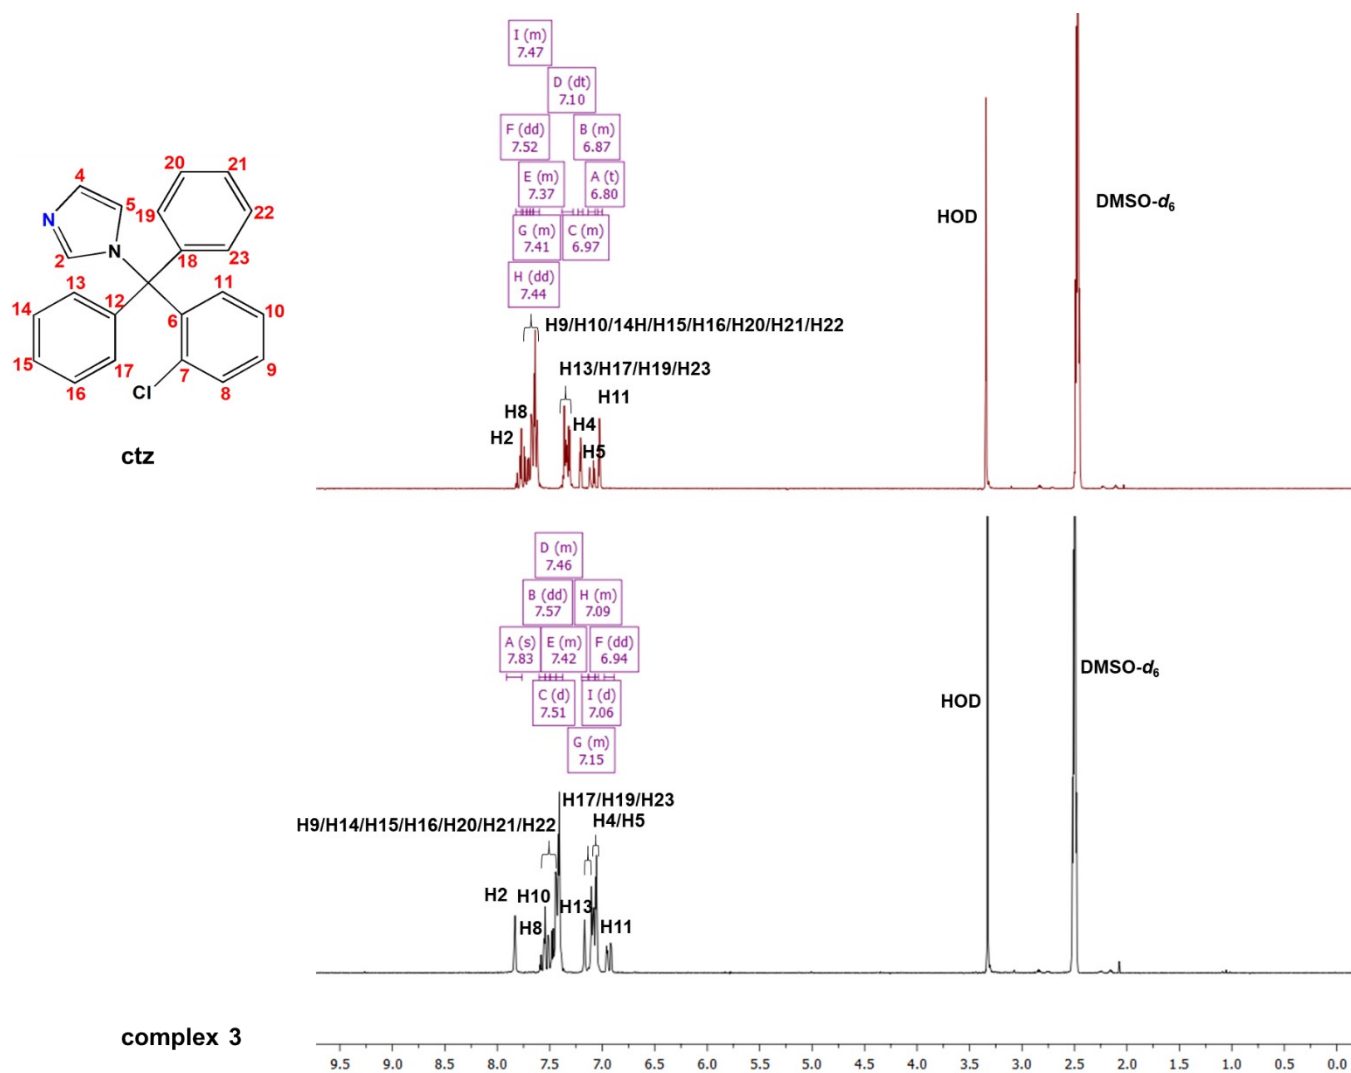

Fig. S5 <sup>1</sup>H NMR spectra of clotrimazole (ctz) and complex 3 (DMSO, 200 MHz).



| Ion Mass | Calc Ion Mass | Difference | IonFormula            | IonSpecies | Best |
|----------|---------------|------------|-----------------------|------------|------|
| 866.9583 | 866.9586      | 0.3        | C41 H30 Ag Cl6 N2     | (M+H)+     |      |
| 866.9583 | 866.9577      | -0.5       | C26 H36 Ag Cl6 N3 O10 | (M+H)+     |      |
| 866.9583 | 866.9577      | -0.6       | C25 H30 Ag Cl6 N10 O5 | (M+H)+     |      |
| 866.9583 | 866.9591      | 0.8        | C27 H32 Ag Cl6 N7 O6  | (M+H)+     |      |
| 866.9583 | 866.9564      | -1.9       | C24 H34 Ag Cl6 N6 O9  | (M+H)+     |      |
| 866.9583 | 866.9604      | 2.1        | C29 H34 Ag Cl6 N4 O7  | (M+H)+     |      |
| 866.9583 | 866.9559      | -2.4       | C38 H32 Ag Cl6 N O3   | (M+H)+     |      |
| 866.9583 | 866.9617      | 3.5        | C30 H30 Ag Cl6 N8 O3  | (M+H)+     |      |
| 866.9583 | 866.9618      | 3.5        | C31 H36 Ag Cl6 N O8   | (M+H)+     |      |
| 866.9583 | 866.9545      | -3.7       | C36 H30 Ag Cl6 N4 O2  | (M+H)+     | ✓    |

## MS Spectrum

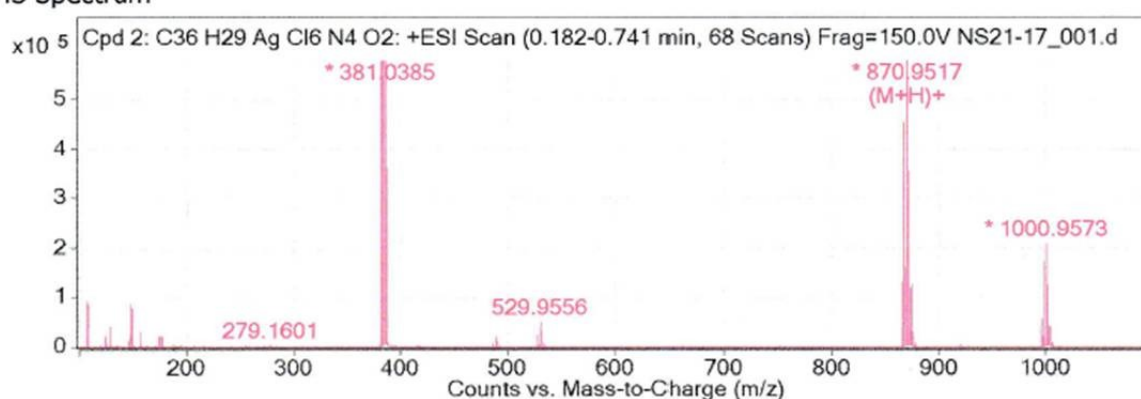

## MFE MS Zoomed Spectrum

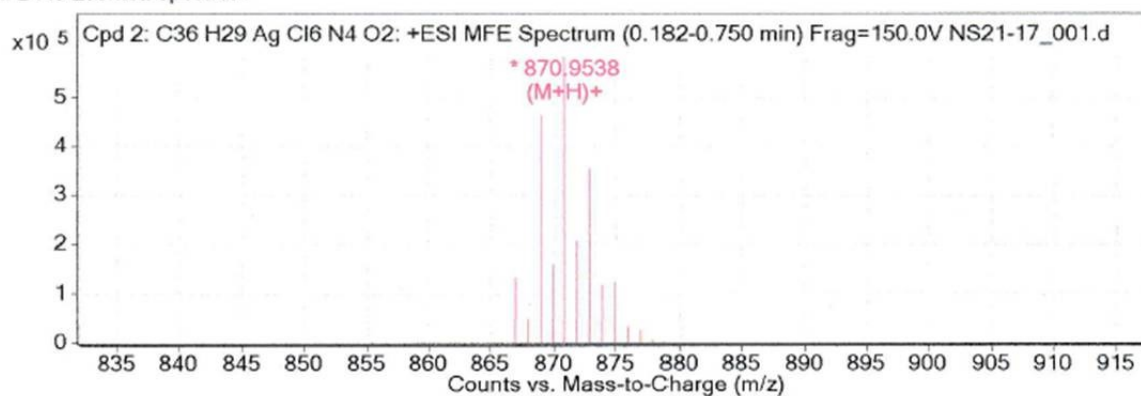

**Fig. S6** ESI-HRMS spectra in the positive mode of complex **1** recorded after its dissolving in  $\text{CH}_3\text{CN}$ . Main peaks observed can be assigned to the  $[\text{Ag}(\text{ecz})_2]^+$  (866.9583) and  $\text{eczH}^+$  (381.0385) species.

| Ion Mass | Calc Ion Mass | Difference | IonFormula          | IonSpecies | Best |
|----------|---------------|------------|---------------------|------------|------|
| 497.0447 | 497.0448      | 0.1        | C17 H21 Ag F3 N2 O5 | (M+H)+     |      |
| 497.0447 | 497.0448      | 0.1        | C16 H15 Ag F3 N9    | (M+H)+     |      |
| 497.0447 | 497.0446      | -0.1       | C12 H20 Ag F4 N5 O5 | (M+H)+     |      |
| 497.0447 | 497.0452      | 0.6        | C23 H19 Ag F5       | (M+H)+     |      |
| 497.0447 | 497.0457      | 1.1        | C9 H21 Ag F5 N5 O6  | (M+H)+     |      |
| 497.0447 | 497.0435      | -1.2       | C15 H19 Ag F3 N5 O4 | (M+H)+     |      |
| 497.0447 | 497.0459      | 1.3        | C13 H16 Ag F4 N9 O  | (M+H)+     |      |
| 497.0447 | 497.0459      | 1.3        | C14 H22 Ag F4 N2 O6 | (M+H)+     |      |
| 497.0447 | 497.0433      | -1.4       | C10 H18 Ag F4 N8 O4 | (M+H)+     |      |
| 497.0447 | 497.0461      | 1.5        | C18 H17 Ag F3 N6 O  | (M+H)+     | ✓    |

## MS Spectrum

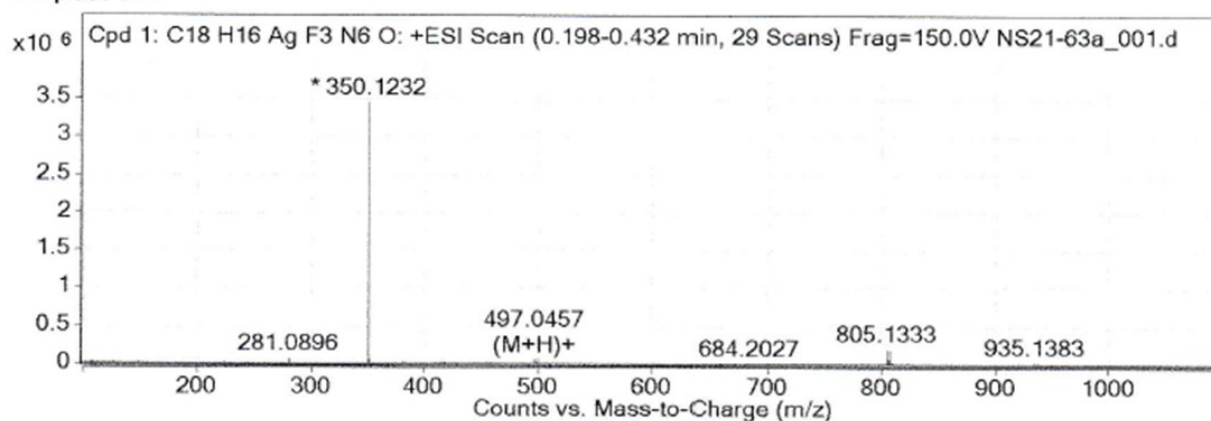

## MFE MS Zoomed Spectrum

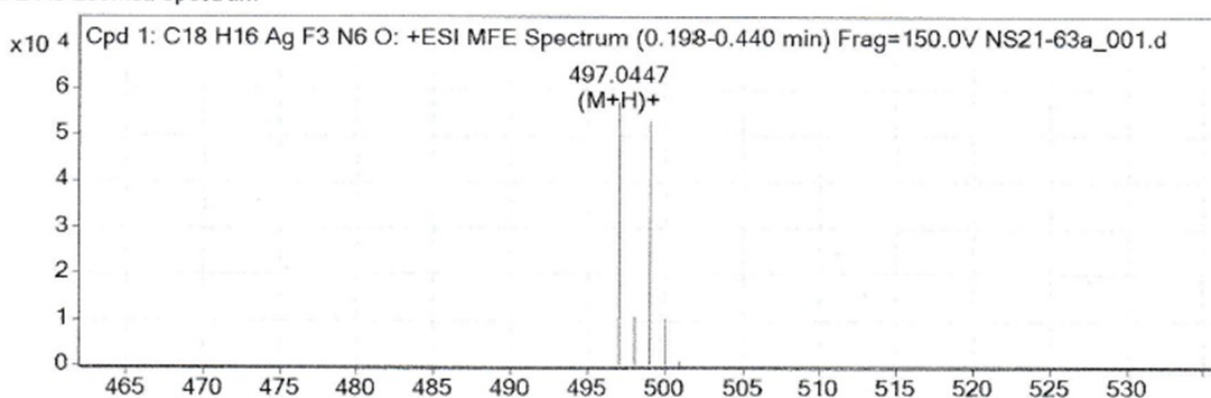

**Fig. S7** ESI-HRMS spectra in the positive mode of complex **2** recorded after its dissolving in CH<sub>3</sub>CN. The main peak detected can be assigned to the [Ag(vcz)(MeCN)]<sup>+</sup> species (497.0447).

| Ion Mass | Calc Ion Mass | Difference | IonFormula            | IonSpecies | Best |
|----------|---------------|------------|-----------------------|------------|------|
| 795.1209 | 795.1211      | 0.2        | C30 H36 Ag Cl2 N9 O6  | (M+H)+     |      |
| 795.1209 | 795.1206      | -0.3       | C44 H34 Ag Cl2 N4     | (M+H)+     | ✓    |
| 795.1209 | 795.1219      | 1          | C46 H36 Ag Cl2 N O    | (M+H)+     |      |
| 795.1209 | 795.1198      | -1.1       | C29 H40 Ag Cl2 N5 O10 | (M+H)+     |      |
| 795.1209 | 795.1224      | 1.5        | C32 H38 Ag Cl2 N6 O7  | (M+H)+     |      |
| 795.1209 | 795.1193      | -1.7       | C43 H38 Ag Cl2 O4     | (M+H)+     |      |
| 795.1209 | 795.1238      | 2.9        | C33 H34 Ag Cl2 N10 O3 | (M+H)+     |      |
| 795.1209 | 795.1238      | 2.9        | C34 H40 Ag Cl2 N3 O8  | (M+H)+     |      |
| 795.1209 | 795.1179      | -3         | C41 H36 Ag Cl2 N3 O3  | (M+H)+     |      |
| 795.1209 | 795.1251      | 4.2        | C35 H36 Ag Cl2 N7 O4  | (M+H)+     |      |

## MS Spectrum

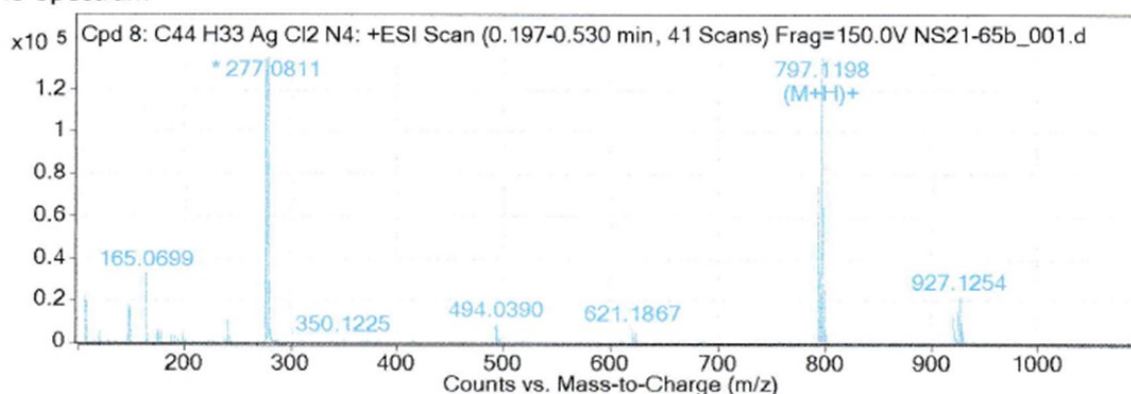

## MFE MS Zoomed Spectrum

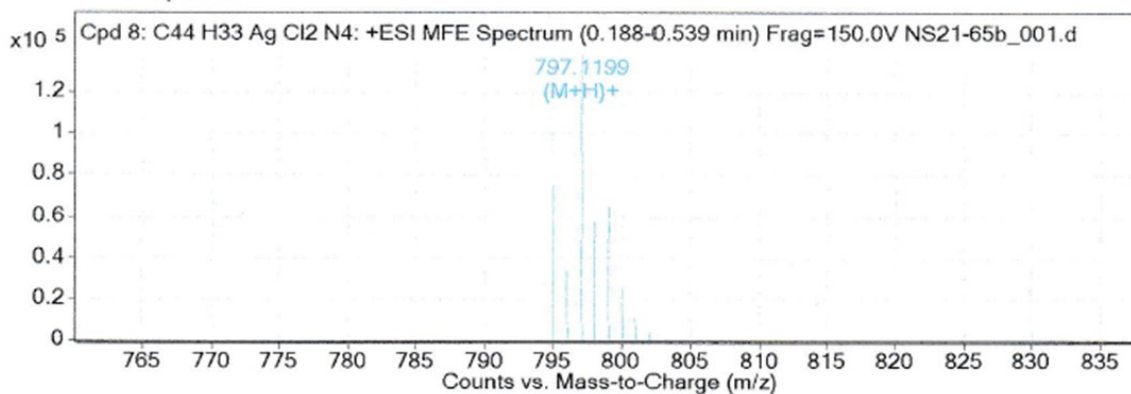

**Fig. S8** ESI-HRMS spectra in the positive mode of complex **3** recorded after its dissolving in CH<sub>3</sub>CN. Main peaks observed can be assigned to the [Ag(ctz)<sub>2</sub>]<sup>+</sup> (795.1209) and ctzH<sup>+</sup> (277.0811) species.

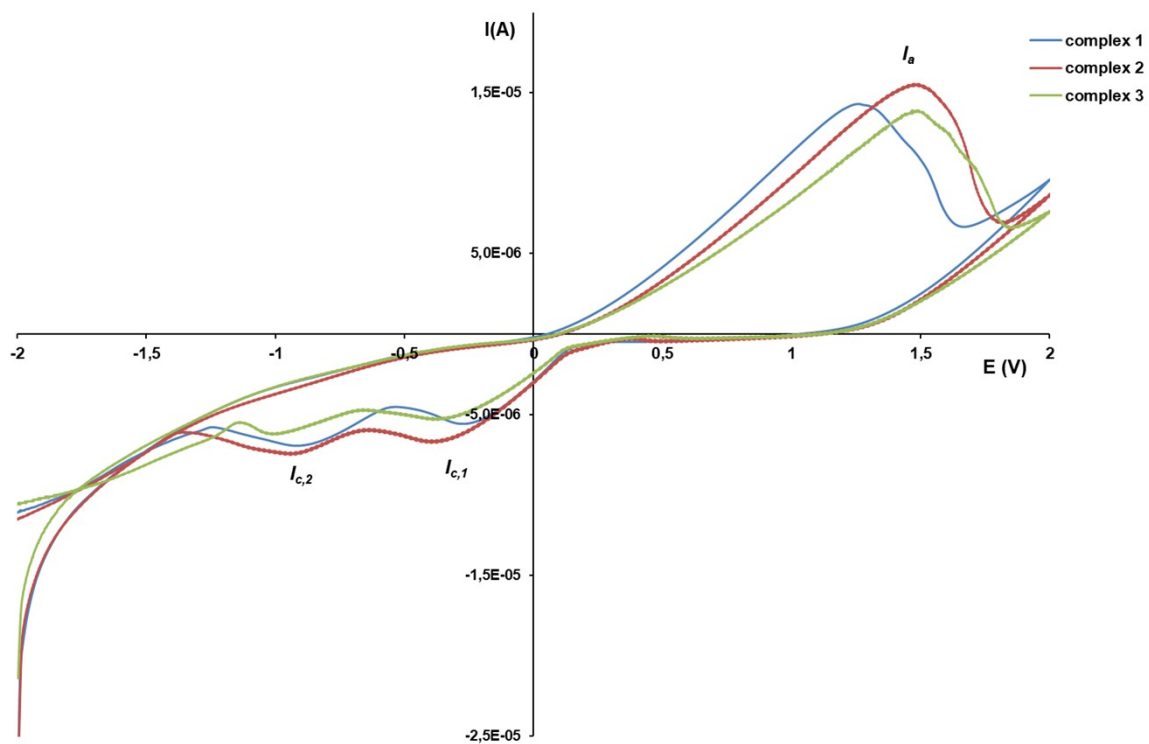

**Fig. S9** Cyclic voltammograms of complexes **1** – **3** recorded at GC electrode in DMSO and 0.1 M TBAHP as a supporting electrolyte with a scan rate of  $50 \text{ mV s}^{-1}$ .

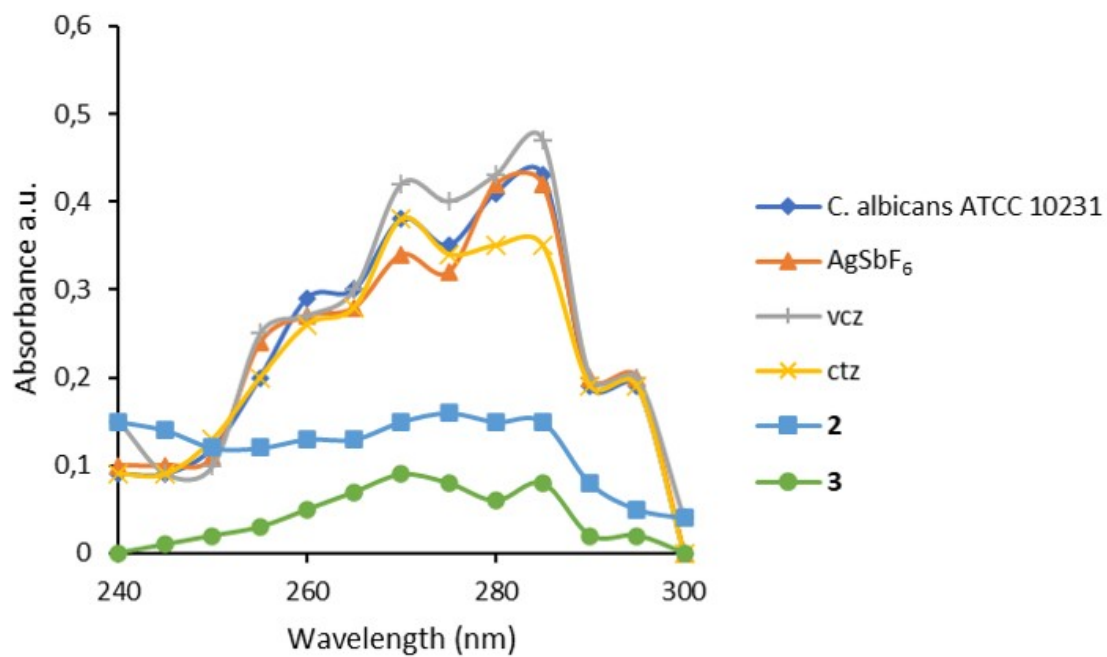

**Fig. S10** UV-Vis spectrophotometric ergosterol profiles between 240 and 300 nm of *C. albicans* ATCC 10231 cultures treated with  $0.5 \times$  MIC of complexes **2** and **3**, azoles vcz and ctz, and AgSbF<sub>6</sub>.

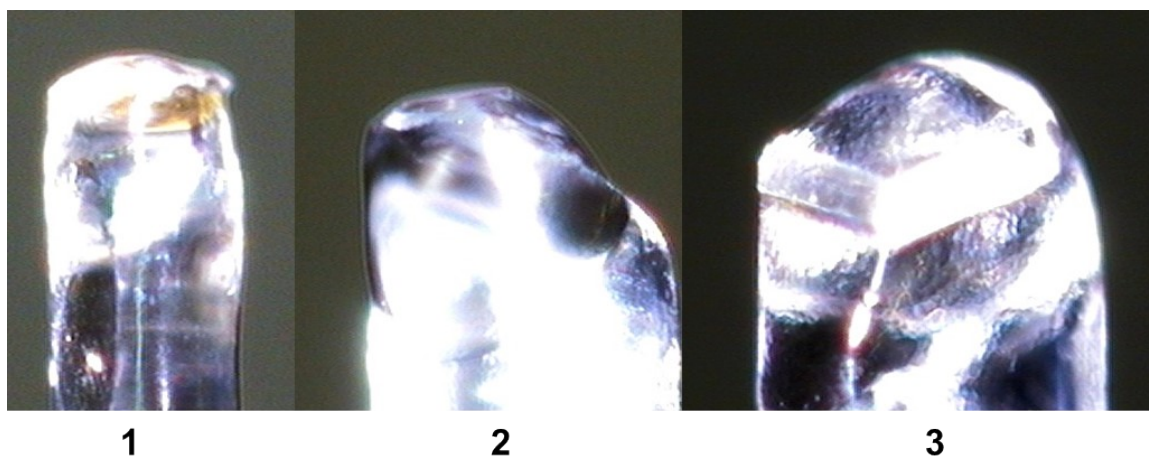

**Fig. S11** Photographs of the analyzed crystals of complexes **1 – 3**.

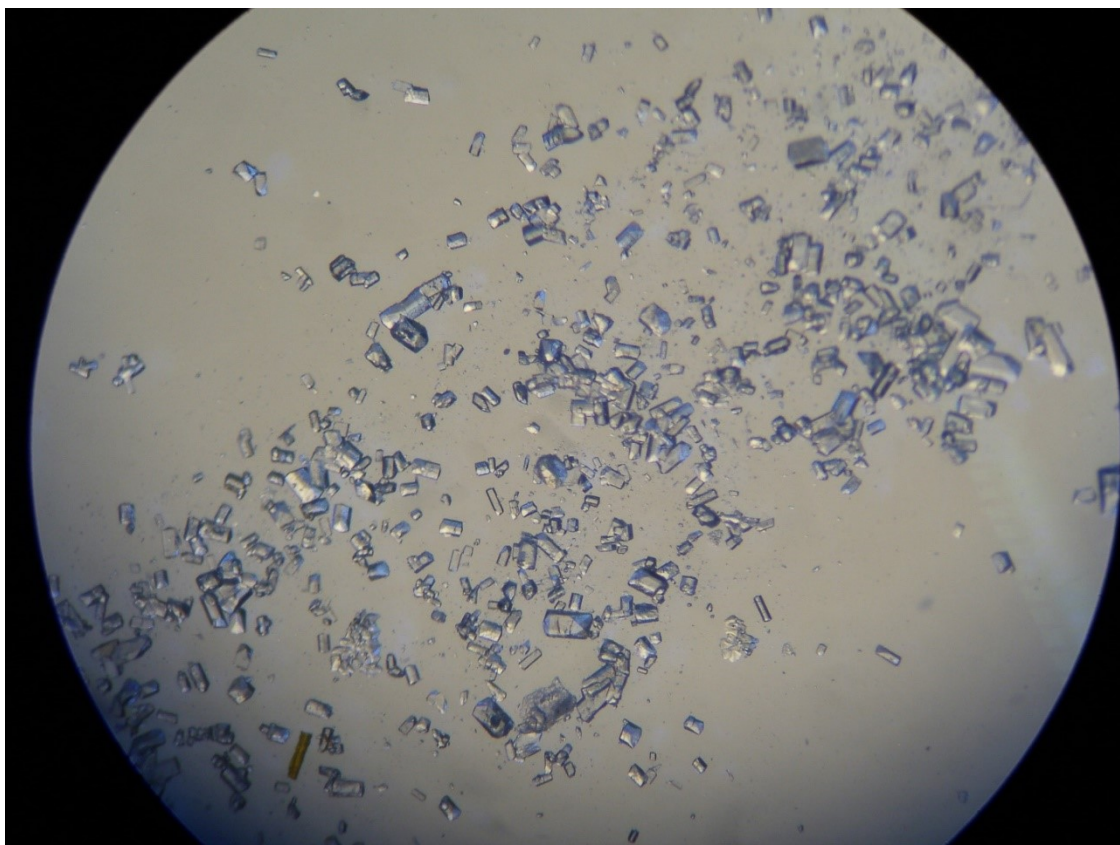

**Fig. S12** Photograph of the crystals of **3** under the microscope (10× magnification).

**Table S1** The selectivity index value (SI) of silver(I) complexes **1 – 3** and the azoles on *Candida* strains

| Silver(I) compound/azole | Test organism | <i>C. albicans</i> | <i>C. parapsilosis</i> | <i>C. krusei</i> | <i>C. glabrata</i> |
|--------------------------|---------------|--------------------|------------------------|------------------|--------------------|
|                          |               | ATCC 10231         | ATCC 22019             | ATCC 6258        | ATCC 2001          |
| <b>1</b>                 |               | 4.4                | 4.4                    | <u>0.4</u>       | <u>0.9</u>         |
| econazole (ecz)          |               | 1.5                | 2.6                    | <u>0.7</u>       | <u>0.2</u>         |
| <b>2</b>                 |               | 75.2               | <b>3610</b>            | <b>3610</b>      | 601.7              |
| voriconazole (vcz)       |               | 24.0               | <b>2863</b>            | <b>613.6</b>     | 1.5                |
| <b>3</b>                 |               | 133.3              | <b>1600</b>            | 533.3            | 16.5               |
| clotrimazole (ctz)       |               | 3.3                | <u>0.8</u>             | 6.2              | 1.0                |
| AgSbF <sub>6</sub>       |               | 5.0                | 203.3                  | 3.9              | 7.8                |

<sup>a</sup>the five highest values are marked in bold, while the five lowest (not so favorable) values are underlined.



**Table S2** Percentage of *C. albicans* ATCC 10231 biofilm formation inhibition by treatment with  $0.5 \times$  MIC of the tested compounds after 48 h

| <b>Compounds</b>                  | AgSbF <sub>6</sub> | <b>2</b>   | <b>3</b>   | vcz        | ctz        |
|-----------------------------------|--------------------|------------|------------|------------|------------|
| % inhibition of biofilm formation | 88.4 ± 3.1         | 87.0 ± 0.4 | 86.4 ± 1.3 | 62.5 ± 6.3 | 79.1 ± 3.9 |

Table S3 Crystallographic data for complexes 1 – 3

| Complex                                        | 1                                                                                                 | 2                                                                                   | 3                                                                                  |
|------------------------------------------------|---------------------------------------------------------------------------------------------------|-------------------------------------------------------------------------------------|------------------------------------------------------------------------------------|
| CCDC No.                                       | 2277941                                                                                           | 2277943                                                                             | 2277942                                                                            |
| Empirical formula                              | C <sub>36</sub> H <sub>30</sub> AgCl <sub>6</sub> F <sub>6</sub> N <sub>4</sub> O <sub>2</sub> Sb | C <sub>32</sub> H <sub>28</sub> AgF <sub>12</sub> N <sub>10</sub> O <sub>2</sub> Sb | C <sub>44</sub> H <sub>34</sub> AgCl <sub>2</sub> F <sub>6</sub> N <sub>4</sub> Sb |
| Formula weight [g mol <sup>-1</sup> ]          | 1106.96                                                                                           | 1042.26                                                                             | 1033.27                                                                            |
| Temperature [K]                                | 150.00(10)                                                                                        | 150.00(10)                                                                          | 150.00(10)                                                                         |
| Crystal system                                 | monoclinic                                                                                        | triclinic                                                                           | orthorhombic                                                                       |
| Space group                                    | P2 <sub>1</sub> /n                                                                                | P1                                                                                  | Fdd2                                                                               |
| a [Å]                                          | 15.8651(10)                                                                                       | 6.4313(3)                                                                           | 31.1679(12)                                                                        |
| b [Å]                                          | 9.0452(4)                                                                                         | 9.8300(5)                                                                           | 30.6135(11)                                                                        |
| c [Å]                                          | 16.4734(12)                                                                                       | 15.7404(5)                                                                          | 8.4227(5)                                                                          |
| α [°]                                          | 90                                                                                                | 100.272(3)                                                                          | 90                                                                                 |
| β [°]                                          | 118.245(9)                                                                                        | 99.905(3)                                                                           | 90                                                                                 |
| γ [°]                                          | 90                                                                                                | 97.173(4)                                                                           | 90                                                                                 |
| Volume [Å <sup>3</sup> ]                       | 2082.5(3)                                                                                         | 952.05(7)                                                                           | 8036.7(6)                                                                          |
| Z                                              | 2                                                                                                 | 1                                                                                   | 16                                                                                 |
| ρ <sub>calc</sub> [g cm <sup>-3</sup> ]        | 1.765                                                                                             | 1.818                                                                               | 1.708                                                                              |
| μ [mm <sup>-1</sup> ]                          | 1.569                                                                                             | 1.328                                                                               | 1.359                                                                              |
| F(000)                                         | 1088.0                                                                                            | 512.0                                                                               | 4096.0                                                                             |
| Crystal size [mm <sup>3</sup> ]                | 0.2 × 0.05 × 0.05                                                                                 | 0.1 × 0.1 × 0.025                                                                   | 0.15 × 0.1 × 0.01                                                                  |
| Radiation                                      | Mo Kα<br>(λ = 0.71073)                                                                            | Mo Kα<br>(λ = 0.71073)                                                              | Mo Kα<br>(λ = 0.71073)                                                             |
| 2θ range for data collection [°]               | 4.91 to 54.966                                                                                    | 5.368 to 54.964                                                                     | 5.184 to 54.95                                                                     |
| Index ranges                                   | -20 ≤ h ≤ 20,<br>-11 ≤ k ≤ 11,<br>-20 ≤ l ≤ 21                                                    | -8 ≤ h ≤ 8,<br>-12 ≤ k ≤ 12,<br>-20 ≤ l ≤ 20                                        | -38 ≤ h ≤ 40,<br>-24 ≤ k ≤ 38,<br>-8 ≤ l ≤ 10                                      |
| Reflections collected                          | 17804                                                                                             | 14307                                                                               | 9529                                                                               |
| Independent reflections                        | 4711 [R <sub>int</sub> = 0.0365,<br>R <sub>sigma</sub> = 0.0384]                                  | 7998 [R <sub>int</sub> = 0.0355,<br>R <sub>sigma</sub> = 0.0577]                    | 3778 [R <sub>int</sub> = 0.0170,<br>R <sub>sigma</sub> = 0.0175]                   |
| Data/restraints/parameters                     | 4711/0/256                                                                                        | 7998/57/527                                                                         | 3778/3/273                                                                         |
| Goodness-of-fit on F <sup>2</sup>              | 1.031                                                                                             | 0.994                                                                               | 1.093                                                                              |
| Final R indexes [I ≥ 2σ (I)]                   | R <sub>1</sub> = 0.0434,<br>wR <sub>2</sub> = 0.0994                                              | R <sub>1</sub> = 0.0306,<br>wR <sub>2</sub> = 0.0540                                | R <sub>1</sub> = 0.0252,<br>wR <sub>2</sub> = 0.0566                               |
| Final R indexes [all data]                     | R <sub>1</sub> = 0.0757,<br>wR <sub>2</sub> = 0.1125                                              | R <sub>1</sub> = 0.0361,<br>wR <sub>2</sub> = 0.0562                                | R <sub>1</sub> = 0.0286,<br>wR <sub>2</sub> = 0.0582                               |
| Largest diff. peak / hole [e Å <sup>-3</sup> ] | 0.97/-0.78                                                                                        | 0.35/-0.55                                                                          | 0.30/-0.61                                                                         |

**Spectroscopic characterization of the studied azoles**

Econazole (ecz). MW = 381.68 g mol<sup>-1</sup>. IR (KBr,  $\nu$ , cm<sup>-1</sup>): 3115w, 3091w, 3064w ( $\nu(\text{C}_{\text{diazole}}\text{-H})$  and  $\nu(\text{C}_{\text{ar}}\text{-H})$ ), 2981w, 2969w, 2946w ( $\nu(\text{C-H})$ ), 1590m, 1564m, 1505s, 1489s, 1473m, 1432m ( $\nu(\text{C}_{\text{ar}}=\text{C}_{\text{ar}})$  and  $\nu(\text{C=N})$ ), 1233s, 1200m ( $\beta(\text{C}_{\text{ar}}\text{-H})$  and  $\beta(\text{C}_{\text{diazole}}\text{-H})$ ), 1107s ( $\nu(\text{C-O})$ ), 1090vs, 1046m, 1032m ( $\nu(\text{C}_{\text{ar}}\text{-Cl})$ ), 800m, 787m, 733m, 661m, 626m ( $\gamma(\text{C}_{\text{ar}}\text{-H})$ ) and ( $\gamma(\text{C}_{\text{diazole}}\text{-H})$ ). <sup>1</sup>H NMR (200 MHz, DMSO-*d*<sub>6</sub>):  $\delta$  = 7.68 (*d*, *J* = 2.0 Hz, 1H, C2H), 7.50 (*m*, 1H, C4H), 4.56 (*d*, *J* = 2.0 Hz, 1H, C10H), 7.38 (*dd*, *J* = 4.8, 2.8 Hz, 2H, C5H, C13H), 7.34 (*m*, 1H, C12H), 7.21 (*s*, 1H, C17H), 7.17 (*s*, 1H, H19), 7.04 (*t*, *J* = 1.1 Hz, 1H, C16H), 6.86 (*s*, 1H, C20H), 4.99 (*dd*, *J* = 6.4, 4.4 Hz, C7H), 4.39 (*m*, 2H, C6H), 4.26 ppm (*m*, 2H, C14H). UV-Vis (DMSO,  $\lambda_{\text{max}}$ , nm): 255 ( $\epsilon$  = 4.1 × 10<sup>3</sup> M<sup>-1</sup>cm<sup>-1</sup>).

Voriconazole (vcz). MW = 349.31 g mol<sup>-1</sup>. IR (KBr,  $\nu$ , cm<sup>-1</sup>): 3196br ( $\nu(\text{O-H})$ ), 3120w, 3047w, 3017w ( $\nu(\text{C}_{\text{triazole}}\text{-H})$  and  $\nu(\text{C}_{\text{ar}}\text{-H})$ ), 2995w, 2979w, 2941w ( $\nu(\text{C-H})$ ), 1619s, 1587vs, 1507s, 1496vs, 1451vs, 1408vs ( $\nu(\text{C}_{\text{ar}}=\text{C}_{\text{ar}})$  and  $\nu(\text{C=N})$ ), 1278s ( $\delta(\text{O-H})$ ), 1249m, 1210m ( $\beta(\text{C}_{\text{ar}}\text{-H})$  and  $\beta(\text{C}_{\text{triazole}}\text{-H})$ ), 1132s ( $\nu(\text{C-F})$ ), 1054m ( $\nu(\text{C-O})$ ), 858s, 825w, 787w, 779m, 724m, 718m ( $\gamma(\text{C}_{\text{ar}}\text{-H})$ ) and ( $\gamma(\text{C}_{\text{triazole}}\text{-H})$ ), 622m ( $\beta(\text{C}_{\text{ar}}\text{-F})$ ). <sup>1</sup>H NMR (200 MHz, DMSO-*d*<sub>6</sub>):  $\delta$  = 9.05 (*d*, *J* = 2.9 Hz, 1H, C18H), 8.86 (*d*, *J* = 2.2 Hz, 1H, C20H), 8.24 (*s*, 1H, C5H), 7.62 (*s*, 1H, C3H), 7.29 (*dd*, *J* = 9.0, 6.9 Hz, 1H, C9H), 7.18 (*m*, 1H, C12H), 6.92 (*td*, *J* = 8.6, 2.4 Hz, 1H, C10H), 5.98 (*s*, 1H, OH), 4.81 (*d*, *J* = 14.3 Hz, 1H, C6H), 4.34 (*d*, *J* = 14.3 Hz, C6H), 3.93 (*q*, *J* = 6.9 Hz, C14H), 1.12 (*d*, *J* = 7.0 Hz 3H, C15H). UV-Vis (DMSO,  $\lambda_{\text{max}}$ , nm): 256 ( $\epsilon$  = 8.6 × 10<sup>3</sup> M<sup>-1</sup>cm<sup>-1</sup>).

Clotrimazole (ctz). MW = 344.84 g mol<sup>-1</sup>. IR (KBr,  $\nu$ , cm<sup>-1</sup>): ~3000w ( $\nu(\text{C}_{\text{triazole}}\text{-H})$  and  $\nu(\text{C}_{\text{ar}}\text{-H})$ ), 2970w ( $\nu(\text{C-H})$ ), 1673m, 1566m, 1547m, 1494m, 1467m, 1443m ( $\nu(\text{C}_{\text{ar}}=\text{C}_{\text{ar}})$  and  $\nu(\text{C}_{\text{ar}}=\text{N})$ ), w ( $\delta(\text{CH}_2)$ ), 1262m ( $\nu(\text{C-N})$ ), 1210m ( $\beta(\text{C}_{\text{ar}}\text{-H})$  and  $\beta(\text{C}_{\text{triazole}}\text{-H})$ ), 1114vs, 1081s, 1041m ( $\beta(\text{C}_{\text{ar}}\text{-H})$ ), 903m ( $\beta(\text{C}_{\text{triazole}}\text{-H})$ ), 824m ( $\delta(\text{C-N})$ ), 765s ( $\gamma(\text{C}_{\text{ar}}\text{-H})$ ), 672s ( $\gamma(\text{C}_{\text{ar}}\text{-H})$ ), 660m

*Electronic Supplementary Information*

(triazole ring def.), 633s (v(C–Cl)), 529m (ring def.). <sup>1</sup>H NMR (200 MHz, DMSO-*d*<sub>6</sub>): δ = 7.52 (*dd*, *J* = 4.2, 3.1 Hz, 1H, C2H), 7.47 (*m*, 1H, C8H), 7.44 (*dd*, *J* = 2.5, 1.3 Hz, 1H, C10H), 7.41 (*m*, 2H, C14H, C15H) 7.37 (*m*, 5H, C9H, C16H, C20H, C21H, C22H), 7.10 (*dt*, *J* = 5.3, 2.1 Hz, 4H, C13H, C17H, C19H, C23H), 6.97 (*m*, 1H, C4H), 6.87 (*m*, 1H, C5H), 6.80 ppm (*t*, *J* = 1.4 Hz, 1H, C11H). UV-Vis (DMSO, λ<sub>max</sub>, nm): 255 (ε = 7.9 × 10<sup>3</sup> M<sup>-1</sup>cm<sup>-1</sup>).
